# Supplementary material for: Experiences of patients, family and professional caregivers with Integrated Palliative Care in Europe: protocol for an international, multicenter, prospective, mixed method study
Source: PubMed Central journal article supplement (PMC4254197; doi:10.1186/1472-684x-13-52), 2014-11-21
Supplement: 12904_2014_233_MOESM1_ESM.pdf [file 12904_2014_233_MOESM1_ESM.pdf]

## Additional file 1: Caregiver network analysis questionnaire – patient

### 1. Which caregivers do you have contact with to receive daily care, advice about your disease, medical treatment, psychological support, finances, etc.?

|                                     |                              |                             |
|-------------------------------------|------------------------------|-----------------------------|
| <b>Family/informal caregiver</b>    | <input type="checkbox"/> Yes | <input type="checkbox"/> No |
| <b>GP</b>                           | <input type="checkbox"/> Yes | <input type="checkbox"/> No |
| <b>Home care worker</b>             | <input type="checkbox"/> Yes | <input type="checkbox"/> No |
| <b>Nurse</b>                        | <input type="checkbox"/> Yes | <input type="checkbox"/> No |
| <b>Medical specialist</b>           | <input type="checkbox"/> Yes | <input type="checkbox"/> No |
| <b>Allied Health Professional</b>   | <input type="checkbox"/> Yes | <input type="checkbox"/> No |
| <b>Social Worker</b>                | <input type="checkbox"/> Yes | <input type="checkbox"/> No |
| <b>Faith leader</b>                 | <input type="checkbox"/> Yes | <input type="checkbox"/> No |
| <b>Psychological support worker</b> | <input type="checkbox"/> Yes | <input type="checkbox"/> No |
| <b>Hospice worker</b>               | <input type="checkbox"/> Yes | <input type="checkbox"/> No |
| <b>Other, ...</b>                   | <input type="checkbox"/> Yes | <input type="checkbox"/> No |

### 2. For those with whom you have contact, how often and how do you have contact?

|                                     |                                                                                                                                     |                                                                                                          |
|-------------------------------------|-------------------------------------------------------------------------------------------------------------------------------------|----------------------------------------------------------------------------------------------------------|
| <b>Family/informal caregiver</b>    | <input type="checkbox"/> Daily <input type="checkbox"/> Weekly <input type="checkbox"/> Monthly <input type="checkbox"/> Less Often | <input type="checkbox"/> Face-To-Face <input type="checkbox"/> Telephone <input type="checkbox"/> E-Mail |
| <b>GP</b>                           | <input type="checkbox"/> Daily <input type="checkbox"/> Weekly <input type="checkbox"/> Monthly <input type="checkbox"/> Less Often | <input type="checkbox"/> Face-To-Face <input type="checkbox"/> Telephone <input type="checkbox"/> E-Mail |
| <b>Home care worker</b>             | <input type="checkbox"/> Daily <input type="checkbox"/> Weekly <input type="checkbox"/> Monthly <input type="checkbox"/> Less Often | <input type="checkbox"/> Face-To-Face <input type="checkbox"/> Telephone <input type="checkbox"/> E-Mail |
| <b>Nurse</b>                        | <input type="checkbox"/> Daily <input type="checkbox"/> Weekly <input type="checkbox"/> Monthly <input type="checkbox"/> Less Often | <input type="checkbox"/> Face-To-Face <input type="checkbox"/> Telephone <input type="checkbox"/> E-Mail |
| <b>Medical specialist</b>           | <input type="checkbox"/> Daily <input type="checkbox"/> Weekly <input type="checkbox"/> Monthly <input type="checkbox"/> Less Often | <input type="checkbox"/> Face-To-Face <input type="checkbox"/> Telephone <input type="checkbox"/> E-Mail |
| <b>Physiotherapist</b>              | <input type="checkbox"/> Daily <input type="checkbox"/> Weekly <input type="checkbox"/> Monthly <input type="checkbox"/> Less Often | <input type="checkbox"/> Face-To-Face <input type="checkbox"/> Telephone <input type="checkbox"/> E-Mail |
| <b>Social Worker</b>                | <input type="checkbox"/> Daily <input type="checkbox"/> Weekly <input type="checkbox"/> Monthly <input type="checkbox"/> Less Often | <input type="checkbox"/> Face-To-Face <input type="checkbox"/> Telephone <input type="checkbox"/> E-Mail |
| <b>Faith leader</b>                 | <input type="checkbox"/> Daily <input type="checkbox"/> Weekly <input type="checkbox"/> Monthly <input type="checkbox"/> Less Often | <input type="checkbox"/> Face-To-Face <input type="checkbox"/> Telephone <input type="checkbox"/> E-Mail |
| <b>Psychological support worker</b> | <input type="checkbox"/> Daily <input type="checkbox"/> Weekly <input type="checkbox"/> Monthly <input type="checkbox"/> Less Often | <input type="checkbox"/> Face-To-Face <input type="checkbox"/> Telephone <input type="checkbox"/> E-Mail |
| <b>Hospice worker</b>               | <input type="checkbox"/> Daily <input type="checkbox"/> Weekly <input type="checkbox"/> Monthly <input type="checkbox"/> Less Often | <input type="checkbox"/> Face-To-Face <input type="checkbox"/> Telephone <input type="checkbox"/> E-Mail |
| <b>Other, ...</b>                   | <input type="checkbox"/> Daily <input type="checkbox"/> Weekly <input type="checkbox"/> Monthly <input type="checkbox"/> Less Often | <input type="checkbox"/> Face-To-Face <input type="checkbox"/> Telephone <input type="checkbox"/> E-Mail |

**3. For those with whom you have contact, how would you rate your relationship with this caregiver?**

|                                     |                                    |                                    |                               |                                     |                               |
|-------------------------------------|------------------------------------|------------------------------------|-------------------------------|-------------------------------------|-------------------------------|
| <b>Family/informal caregiver</b>    | <input type="checkbox"/> Excellent | <input type="checkbox"/> Very Good | <input type="checkbox"/> Good | <input type="checkbox"/> Reasonable | <input type="checkbox"/> Poor |
| <b>GP</b>                           | <input type="checkbox"/> Excellent | <input type="checkbox"/> Very Good | <input type="checkbox"/> Good | <input type="checkbox"/> Reasonable | <input type="checkbox"/> Poor |
| <b>Home care worker</b>             | <input type="checkbox"/> Excellent | <input type="checkbox"/> Very Good | <input type="checkbox"/> Good | <input type="checkbox"/> Reasonable | <input type="checkbox"/> Poor |
| <b>Nurse</b>                        | <input type="checkbox"/> Excellent | <input type="checkbox"/> Very Good | <input type="checkbox"/> Good | <input type="checkbox"/> Reasonable | <input type="checkbox"/> Poor |
| <b>Medical specialist</b>           | <input type="checkbox"/> Excellent | <input type="checkbox"/> Very Good | <input type="checkbox"/> Good | <input type="checkbox"/> Reasonable | <input type="checkbox"/> Poor |
| <b>Physiotherapist</b>              | <input type="checkbox"/> Excellent | <input type="checkbox"/> Very Good | <input type="checkbox"/> Good | <input type="checkbox"/> Reasonable | <input type="checkbox"/> Poor |
| <b>Social Worker</b>                | <input type="checkbox"/> Excellent | <input type="checkbox"/> Very Good | <input type="checkbox"/> Good | <input type="checkbox"/> Reasonable | <input type="checkbox"/> Poor |
| <b>Faith leader</b>                 | <input type="checkbox"/> Excellent | <input type="checkbox"/> Very Good | <input type="checkbox"/> Good | <input type="checkbox"/> Reasonable | <input type="checkbox"/> Poor |
| <b>Psychological support worker</b> | <input type="checkbox"/> Excellent | <input type="checkbox"/> Very Good | <input type="checkbox"/> Good | <input type="checkbox"/> Reasonable | <input type="checkbox"/> Poor |
| <b>Hospice worker</b>               | <input type="checkbox"/> Excellent | <input type="checkbox"/> Very Good | <input type="checkbox"/> Good | <input type="checkbox"/> Reasonable | <input type="checkbox"/> Poor |
| <b>Other, ...</b>                   | <input type="checkbox"/> Excellent | <input type="checkbox"/> Very Good | <input type="checkbox"/> Good | <input type="checkbox"/> Reasonable | <input type="checkbox"/> Poor |

**4. For those with whom you have contact, how would you rate care that you receive from these caregiver?**

|                                     |                                    |                                    |                               |                                     |                               |
|-------------------------------------|------------------------------------|------------------------------------|-------------------------------|-------------------------------------|-------------------------------|
| <b>Family/informal caregiver</b>    | <input type="checkbox"/> Excellent | <input type="checkbox"/> Very Good | <input type="checkbox"/> Good | <input type="checkbox"/> Reasonable | <input type="checkbox"/> Poor |
| <b>GP</b>                           | <input type="checkbox"/> Excellent | <input type="checkbox"/> Very Good | <input type="checkbox"/> Good | <input type="checkbox"/> Reasonable | <input type="checkbox"/> Poor |
| <b>Home care worker</b>             | <input type="checkbox"/> Excellent | <input type="checkbox"/> Very Good | <input type="checkbox"/> Good | <input type="checkbox"/> Reasonable | <input type="checkbox"/> Poor |
| <b>Nurse</b>                        | <input type="checkbox"/> Excellent | <input type="checkbox"/> Very Good | <input type="checkbox"/> Good | <input type="checkbox"/> Reasonable | <input type="checkbox"/> Poor |
| <b>Medical specialist</b>           | <input type="checkbox"/> Excellent | <input type="checkbox"/> Very Good | <input type="checkbox"/> Good | <input type="checkbox"/> Reasonable | <input type="checkbox"/> Poor |
| <b>Physiotherapist</b>              | <input type="checkbox"/> Excellent | <input type="checkbox"/> Very Good | <input type="checkbox"/> Good | <input type="checkbox"/> Reasonable | <input type="checkbox"/> Poor |
| <b>Social Worker</b>                | <input type="checkbox"/> Excellent | <input type="checkbox"/> Very Good | <input type="checkbox"/> Good | <input type="checkbox"/> Reasonable | <input type="checkbox"/> Poor |
| <b>Faith leader</b>                 | <input type="checkbox"/> Excellent | <input type="checkbox"/> Very Good | <input type="checkbox"/> Good | <input type="checkbox"/> Reasonable | <input type="checkbox"/> Poor |
| <b>Psychological support worker</b> | <input type="checkbox"/> Excellent | <input type="checkbox"/> Very Good | <input type="checkbox"/> Good | <input type="checkbox"/> Reasonable | <input type="checkbox"/> Poor |
| <b>Hospice worker</b>               | <input type="checkbox"/> Excellent | <input type="checkbox"/> Very Good | <input type="checkbox"/> Good | <input type="checkbox"/> Reasonable | <input type="checkbox"/> Poor |
| <b>Other, ...</b>                   | <input type="checkbox"/> Excellent | <input type="checkbox"/> Very Good | <input type="checkbox"/> Good | <input type="checkbox"/> Reasonable | <input type="checkbox"/> Poor |

**Statements and questions about collaboration between caregivers from whom you receive care:**

**5. These caregivers appear to work together very well.**

Strongly Agree    Agree    Neutral    Disagree    Strongly Disagree

**6. The care given by these caregivers appears to be well-connected.**

Strongly Agree    Agree    Neutral    Disagree    Strongly Disagree

**7. These caregivers pass on information to each other well.**

Strongly Agree    Agree    Neutral    Disagree    Strongly Disagree

**8. These caregivers always know very well what the other caregivers have done.**

Strongly Agree    Agree    Neutral    Disagree    Strongly Disagree

**9. Sometimes I perceive friction between caregivers.**

Strongly Agree    Agree    Neutral    Disagree    Strongly Disagree

**10. Who, do you think, is the main responsible caregiver of all caregivers you receive care from?** (i.e. the person(s) who decide(s) how your care is being organised)

**11. Is there anything missing from the care you receive and who do you think should be providing it?** (Which persons/organisations do you miss and why?)

**12. In your opinion, might there be too many caregivers from whom you receive care?** (Which persons/organisations may be redundant and why?)
